# Supplementary material for: Magnetotail Ion Structuring by Kinetic Ballooning‐Interchange Instability
Source: PubMed Central journal article supplement (PMC9286044; doi:10.1029/2021gl096796), 2022-02-08
Supplement: GRL-49-0-s001.pdf [file GRL-49-0-s001.pdf]

# Supporting Information for "Magnetotail Ion Structuring by Kinetic Ballooning-Interchange Instability"

Evgeny V. Panov<sup>1,2</sup>, San Lu<sup>3</sup>, Philip L. Pritchett<sup>4</sup>

<sup>1</sup>Space Research Institute, Austrian Academy of Sciences, Graz, Austria

<sup>2</sup>Institute of Physics, University of Graz, Austria

<sup>3</sup>University of Science and Technology of China, Hefei, China

<sup>4</sup>Department of Physics and Astronomy, University of California, Los Angeles, CA, USA

## Contents of this file

1. Figures S1-S6.
2. PIC Simulation Setup.

## Additional Supporting Information (Files uploaded separately)

1. Caption for Movie S1.

## Introduction

### PIC Simulation Setup

The present investigation employs a 3-D PIC simulation model that retains the full dynamics for both electrons and ions. The initial magnetic field configuration is similar to those considered previously in [Pritchett and Coroniti, 2010, 2013] and is described by the vector potential  $A_{0y}(x, z)$  given by

$$A_{0y}(x, z) = B_0 L \ln\{\cosh[F(x)(z/L)]/F(x)\}, \quad (1)$$

where  $F(x)$  is a slowly varying but otherwise arbitrary function. For a nonconstant  $F(x)$ , there is a finite  $B_z$  field, which at the center of the current sheet has the form

$$B_{0z}(x, 0) = -B_0 L F'(x)/F(x). \quad (2)$$

The specific configuration used in the present study is illustrated in Figure S6. Figure S6a shows the 2-D  $(x, z)$  magnetic field configuration, and Figure S6b shows the initial equatorial magnetic field profile  $B_{0z}(x, 0)$ . The BICI modes will be excited in the region of the tailward gradient in  $B_z$  ( $20 < x/\rho_{i0} < 28$ ), which corresponds to a region of decreasing entropy as  $x$  increases tailward [Schindler and Birn, 2004; Pritchett and Coroniti, 2013]. Here,  $\rho_{i0}$  is the ion gyroradius in the asymptotic lobe  $B_0$  field.

Previous PIC simulations of BICI generation [Pritchett and Coroniti, 2010, 2013; Pritchett et al., 2014] have considered a charge neutral, generalized Harris configuration in which the ion and electron cross-tail drifts are given by  $V_{di} = -2cT_i/eB_0L$  and  $V_{de} = 2cT_e/eB_0L$ , where  $e$  is the magnitude of the fundamental electric charge and  $L$  is the half-width of the current sheet. In the present study, we consider a charged current sheet in which the electrons carry all of the cross-tail current with a net drift of  $V_{de}^{ch} = 2c(T_i + T_e)/eB_0L$ . Since the ions now carry no current, an electric field  $E_{0z}(x, z)$  must be present in order to balance the nonuniform ion pressure,

$$E_{0z}(x, z) = -(2T_i/eL)F(x) \tanh[F(x)(z/L)]. \quad (3)$$

The (ion) density distribution is given by

$$n(x, z) = n_0 F^2(x) \operatorname{sech}^2[F(x)(z/L)] + n_b, \quad (4)$$

where  $n_0$  is the characteristic equatorial density at  $x/\rho_{i0} = 16$  and  $n_b = 0.08n_0$  is a constant background density. The density distribution for the current-carrying electrons is similar to that for the ions but with a larger characteristic density  $n_e$  given by  $(n_e - n_0)/n_e = [T_i/(T_i + T_e)](V_{de}^{ch}/c)^2$ .

The simulation has a grid  $N_x \times N_y \times N_z = 512 \times 1024 \times 256$  distributed over the ranges  $0 \leq x/\rho_i \leq 32, 0 \leq y/\rho_{i0} \leq 64, -8 \leq z/\rho_{i0} \leq 8$ , so that  $\rho_{i0} = 16\Delta$ , where  $\Delta$  is the grid spacing. The ion to electron mass ratio is  $m_i/m_e = 64$ , all particle temperatures are equal to  $m_i V_A^2/4$  (here  $V_A = (B_0^2/4\pi n_0 m_i)^{1/2}$  is a representative Alfvén speed), the electron plasma frequency/gyrofrequency ratio is  $\sqrt{2}$ , and the electron Debye length is  $\Delta$ . The total number of particles in the simulation is 5.8 billion.

The simulation employs “closed” boundary conditions at the  $x$  boundaries [Pritchett and Coroniti, 1998]. No magnetic flux is allowed to cross these boundaries, corresponding to the condition  $\delta E_y = 0$ , and particles that cross these boundaries are reinserted back into the system in the opposite half  $z$  plane with  $v_x = -v_x$  and  $v_z = -v_z$  [Pritchett et al., 1991]. In addition, the perturbed field  $\delta E_z$  is assumed to vanish at these boundaries. At the  $z$  boundaries, conducting conditions are assumed, and particles striking such a boundary are reintroduced in the opposite half  $z$  plane with  $v_x = -v_x$  and  $v_z = v_z$ . This symmetric condition on the particle reflection is valid in the absence of a guide magnetic field. Periodicity in the  $y$  direction is assumed for both the particles and fields. The coordinate system used in the simulations has  $x$  increasing tailward (away from the Earth),  $y$  directed dawnward, and  $z$  directed northward. In the simulation figures, the coordinates are expressed in units of  $\rho_{i0}$ .

### Caption for Movie S1.

Results from 3D PIC simulation of BICI development in the electron (charged) current sheet as seen in  $B_X$  (a),  $B_Y$  (b) and  $B_Z$  (c) magnetic field components, ion density (d), kinetic ion energy density (e),  $T_{XX}$  (f) and  $T_{XY}$  (g) ion temperature components,  $P_{XY}$  ion pressure tensor component (h), off-plane ion vorticity component  $\omega_{iz}$  (i), and in-plane ion divergence  $\partial V_{iX}/\partial x + \partial V_{iY}/\partial y$  (j) between  $\Omega_{i0}t=161$  and  $\Omega_{i0}t=280$ . The contours of  $B_Z$  magnetic field component are overplotted as black curves. The star glyphs at  $(x/\rho_{i0}, y/\rho_{i0}, z/\rho_{i0})=(10.5, 23.0, -1.5)$  (magenta), at  $(x/\rho_{i0}, y/\rho_{i0}, z/\rho_{i0})=(12.5, 22.0, -1.5)$  (blue) and at  $(x/\rho_{i0}, y/\rho_{i0}, z/\rho_{i0})=(13.5, 20.5, -1.5)$  (cyan) denote the location of three virtual spacecraft also discussed in Figure 3 of the manuscript.

### References

- Pritchett, P. L., and F. V. Coroniti (1998), Interchange instabilities and localized high-speed flows in the convectively-driven near-Earth plasma sheet, in *Substorms-4*, edited by S. Kokubun and Y. Kamide, p. 443, Kluwer Acad. Publ., Dordrecht.
- Pritchett, P. L., and F. V. Coroniti (2010), A kinetic ballooning/interchange instability in the magnetotail, *J. Geophys. Res.*, *115*, A06301, doi:10.1029/2009JA014752.
- Pritchett, P. L., and F. V. Coroniti (2013), Structure and consequences of the kinetic ballooning/interchange instability in the magnetotail, *J. Geophys. Res.*, *118*, 146–159, doi: 10.1029/2012JA018143.
- Pritchett, P. L., F. V. Coroniti, R. Pellat, and H. Karimabadi (1991), Collisionless reconnection in two-dimensional magnetotail equilibria, *J. Geophys. Res.*, *96*, 11, doi: 10.1029/91JA01094.
- Pritchett, P. L., F. V. Coroniti, and Y. Nishimura (2014), The kinetic ballooning/interchange instability as a source of dipolarization fronts and auroral streamers, *J. Geophys. Res.*, *119*, 4723–4739, doi:10.1002/2014JA019890.
- Schindler, K., and J. Birn (2004), MHD stability of magnetotail equilibria including a background pressure, *J. Geophys. Res.*, *109*, A10208, doi:10.1029/2004JA010537.

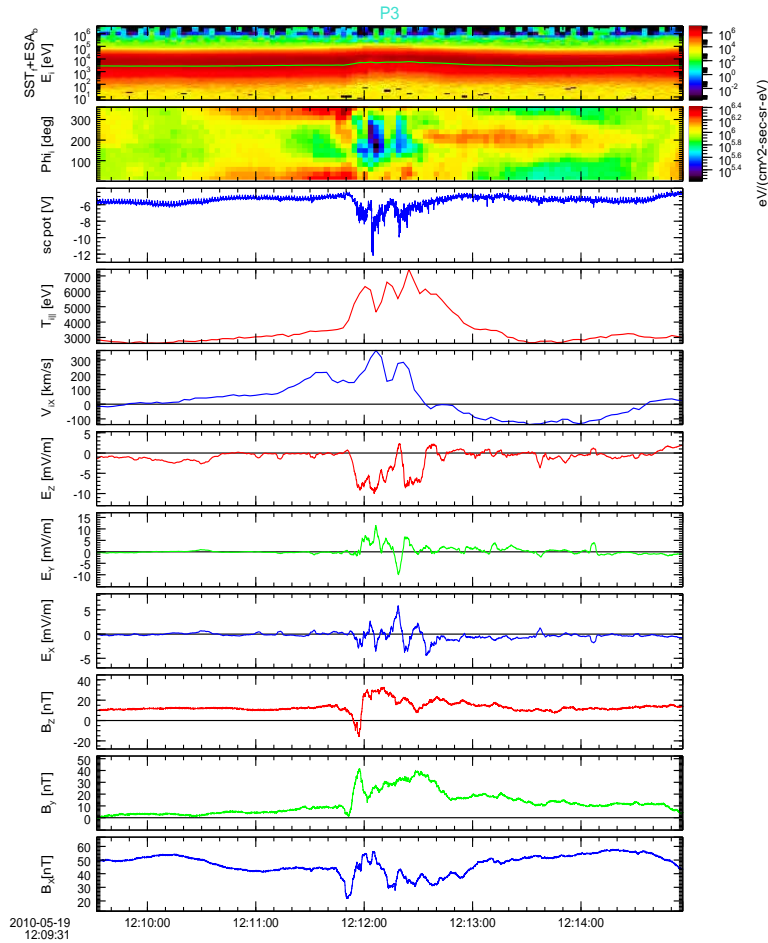

**Figure S1.** Time History of Events and Macroscale Interactions during Substorms probe P3 observations on 19 May 2010 between 12:09:30 and 12:15 UT. From top to bottom are shown: joint SST (full mode) and ESA (burst mode) ion differential flux spectra, azimuthal (PHI; 0 degrees corresponds to the Earthward direction) angle of ion motion, spacecraft potential (a high-resolution proxy to electron density), parallel component of the ion temperature (red), GSM  $V_X$  ion velocity component, DSL  $E_Z$  (red),  $E_Y$  (green) and  $E_X$  (blue) electric field components 3s-long-sliding-window averaged, GSM  $B_Z$  (red),  $B_Y$  (green) and  $B_X$  (blue) magnetic field components.

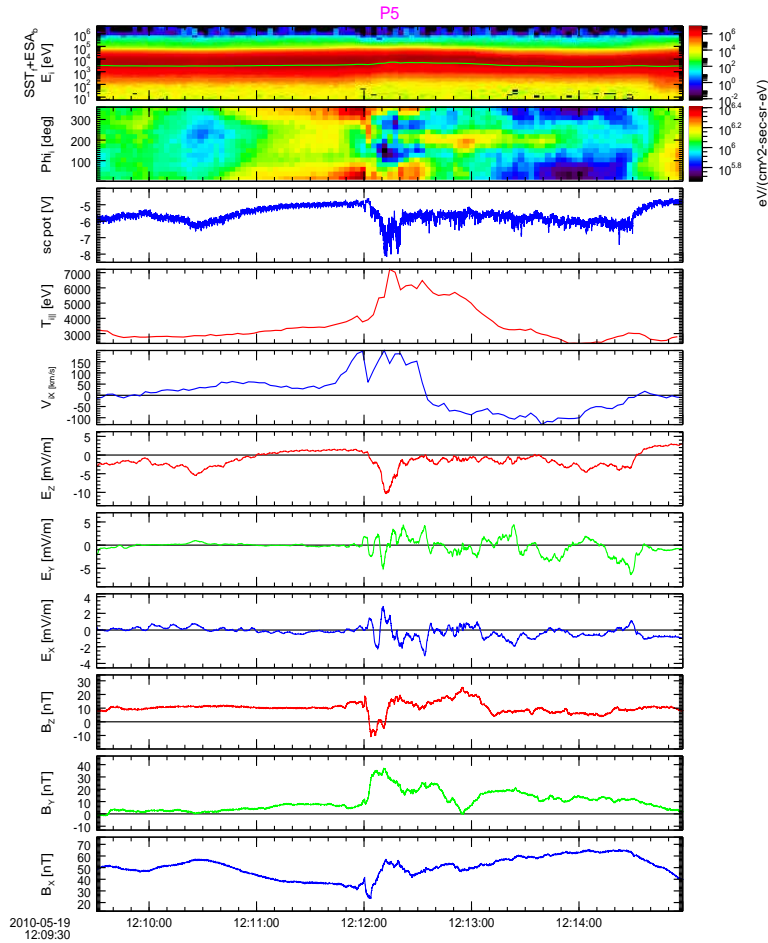

**Figure S2.** Time History of Events and Macroscale Interactions during Substorms probe P5 observations on 19 May 2010 between 12:09:30 and 12:15 UT. From top to bottom are shown: joint SST (full mode) and ESA (burst mode) ion differential flux spectra, azimuthal (PHI; 0 degrees corresponds to the Earthward direction) angle of ion motion, spacecraft potential (a high-resolution proxy to electron density), parallel component of the ion temperature (red), GSM  $V_X$  ion velocity component, DSL  $E_Z$  (red),  $E_Y$  (green) and  $E_X$  (blue) electric field components 3s-long-sliding-window averaged, GSM  $B_Z$  (red),  $B_Y$  (green) and  $B_X$  (blue) magnetic field components.

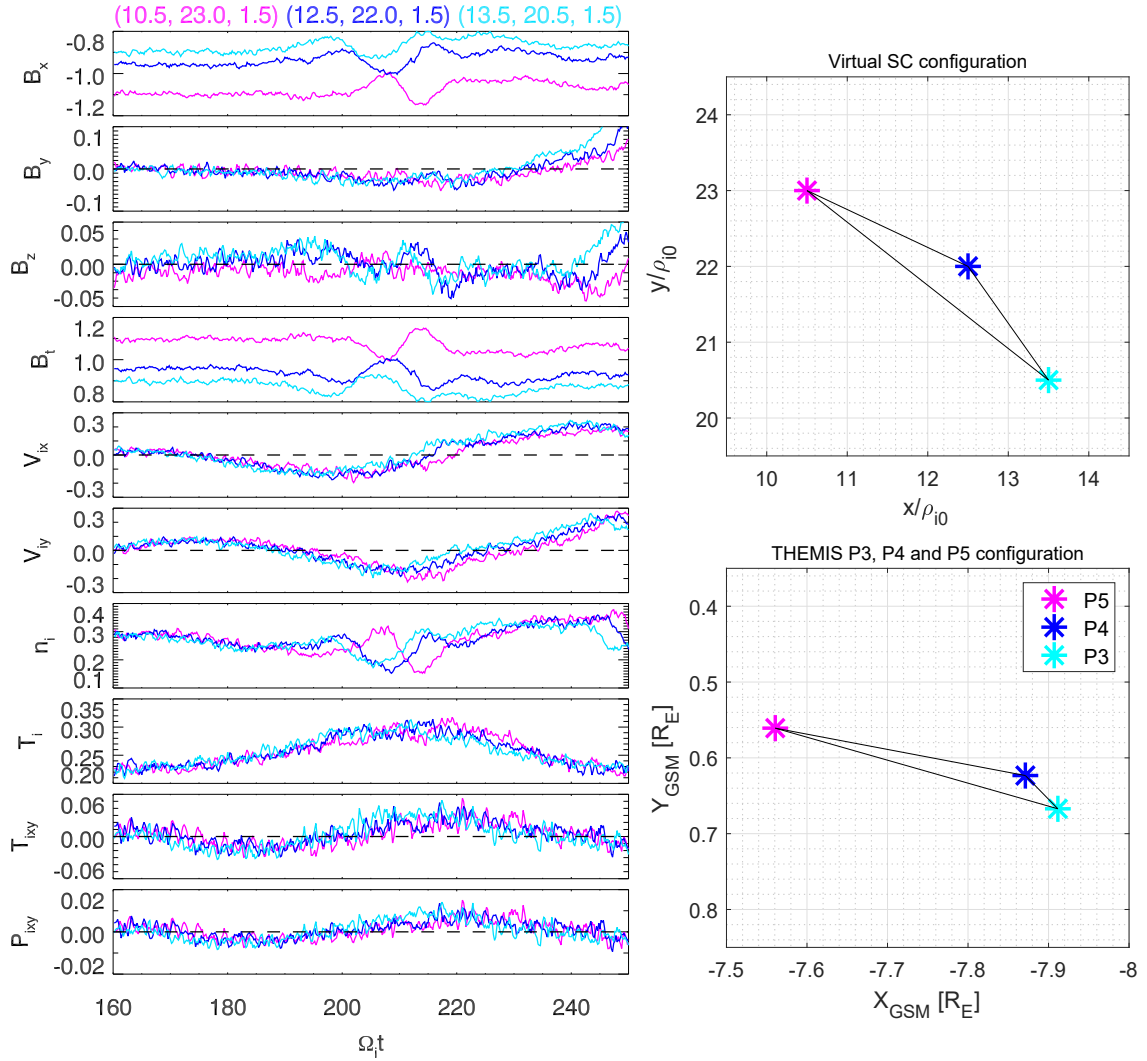

**Figure S3.** (left) Results from 3D PIC simulation of BICI development in the electron (charged) current sheet between  $\Omega_{i0}t=160$  and  $\Omega_{i0}t=250$  as seen in (from top to bottom) three magnetic field components and in the total magnetic field ( $B_x$ ,  $B_y$ ,  $B_z$ ,  $B_t$ ), X and Y ion velocity components  $V_{ix}$  and  $V_{iy}$ , ion density  $n_i$ , average ion temperature  $T_i$ , nondiagonal ion temperature and ion pressure tensor elements  $T_{ixy}$  and  $P_{ixy}$ . In the simulation, the X axis is directed antisward and the Y axis is downward, which is opposite to the GSM X and Y axes. The three curves correspond to the location of three virtual spacecraft at  $(x/\rho_{i0}, y/\rho_{i0}, z/\rho_{i0})=(10.5, 23.0, 1.5)$  (magenta), at  $(x/\rho_{i0}, y/\rho_{i0}, z/\rho_{i0})=(12.5, 22.0, 1.5)$  (blue) and at  $(x/\rho_{i0}, y/\rho_{i0}, z/\rho_{i0})=(13.5, 20.5, 1.5)$  (cyan), i.e. at the same X and Y positions as in the left column of Figure 3 of the manuscript, but in the opposite Z-location. (right) xy configurations of three virtual spacecraft (top) and three THEMIS probes at 12:12UT (bottom).

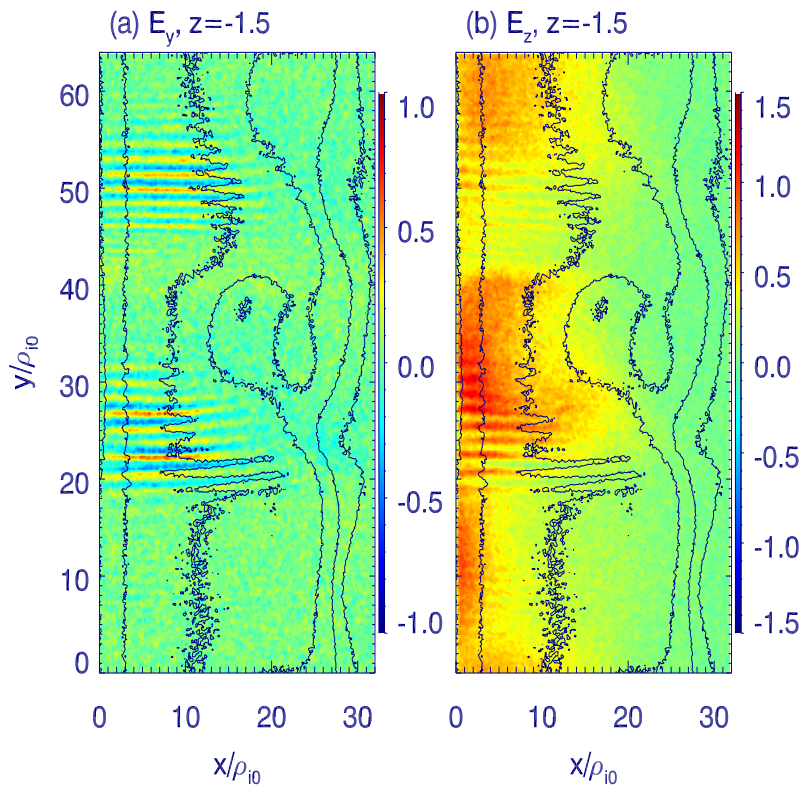

**Figure S4.** PIC simulated  $E_y$  (a),  $E_z$  (b) electric field components. The results are plotted in  $x, y$  plane cut at  $z/\rho_{i0} = -1.5$  at time  $\Omega_{i0}t = 210$ .

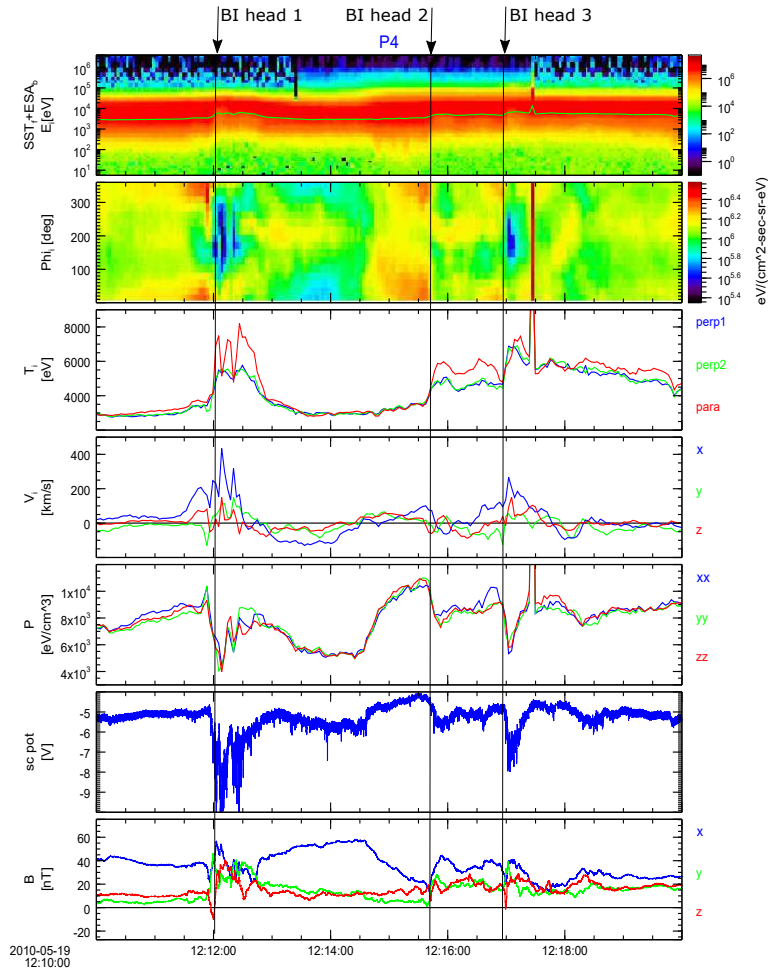

**Figure S5.** From top to bottom are shown Time History of Events and Macroscale Interactions during Substorms probe P4 observations on 19 May 2010 between 12:10:00 and 12:20 UT: joint SST (full mode) and ESA (burst mode) ion differential flux spectra, azimuthal (PHI; 0 degrees corresponds to the Earthward direction) angle of ion velocity, parallel (red) and perpendicular (blue and green) components of the ion temperature, three GSM components of the ion velocity  $V_i$ , three diagonal GSM components of the ion pressure tensor  $P_{xx}$  (blue),  $P_{yy}$  (green) and  $P_{zz}$  (red), spacecraft potential (a high-resolution proxy to electron density), and three GSM components of the magnetic field.

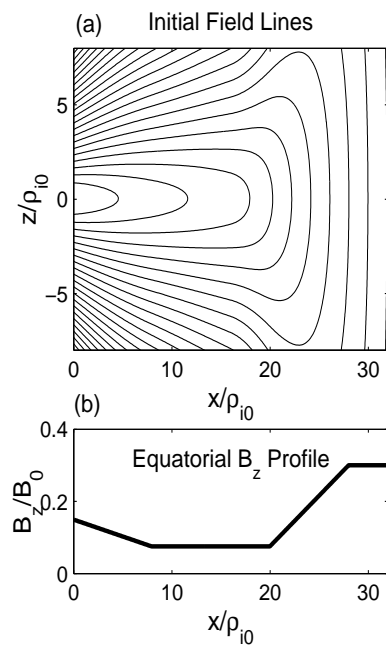

**Figure S6.** Specific initial PIC simulation configuration used in the present study: 2-D  $(x, z)$  magnetic field configuration (a), and initial equatorial magnetic field profile  $B_{0z}(x, 0)$  (b).
